# Supplementary material for: Periodontal Conditions and Pathogens Associated with Pre-Eclampsia: A Scoping Review
Source: MDPI journal article supplement (doi:10.3390/ijerph18137194), 2021-07-05
Supplement: s1 [file s1]

**Table S1.** Preferred Reporting Items for Systematic reviews and Meta-Analyses extension for Scoping Reviews (PRISMA-ScR) Checklist

| SECTION                           | ITEM | PRISMA-ScR CHECKLIST ITEM                                                                                                                                                                                                                                                                                  | REPORTED ON PAGE # |
|-----------------------------------|------|------------------------------------------------------------------------------------------------------------------------------------------------------------------------------------------------------------------------------------------------------------------------------------------------------------|--------------------|
| <b>TITLE</b>                      |      |                                                                                                                                                                                                                                                                                                            |                    |
| Title                             | 1    | Identify the report as a scoping review.                                                                                                                                                                                                                                                                   | 1                  |
| <b>ABSTRACT</b>                   |      |                                                                                                                                                                                                                                                                                                            |                    |
| Structured summary                | 2    | Provide a structured summary that includes (as applicable): background, objectives, eligibility criteria, sources of evidence, charting methods, results, and conclusions that relate to the review questions and objectives.                                                                              | 1                  |
| <b>INTRODUCTION</b>               |      |                                                                                                                                                                                                                                                                                                            |                    |
| Rationale                         | 3    | Describe the rationale for the review in the context of what is already known. Explain why the review questions/objectives lend themselves to a scoping review approach.                                                                                                                                   | 1-2                |
| Objectives                        | 4    | Provide an explicit statement of the questions and objectives being addressed with reference to their key elements (e.g., population or participants, concepts, and context) or other relevant key elements used to conceptualize the review questions and/or objectives.                                  | 2                  |
| <b>METHODS</b>                    |      |                                                                                                                                                                                                                                                                                                            |                    |
| Protocol and registration         | 5    | Indicate whether a review protocol exists; state if and where it can be accessed (e.g., a Web address); and if available, provide registration information, including the registration number.                                                                                                             | 3-4                |
| Eligibility criteria              | 6    | Specify characteristics of the sources of evidence used as eligibility criteria (e.g., years considered, language, and publication status), and provide a rationale.                                                                                                                                       | 3                  |
| Information sources*              | 7    | Describe all information sources in the search (e.g., databases with dates of coverage and contact with authors to identify additional sources), as well as the date the most recent search was executed.                                                                                                  | 3                  |
| Search                            | 8    | Present the full electronic search strategy for at least 1 database, including any limits used, such that it could be repeated.                                                                                                                                                                            | 3                  |
| Selection of sources of evidence† | 9    | State the process for selecting sources of evidence (i.e., screening and eligibility) included in the scoping review.                                                                                                                                                                                      | 3                  |
| Data charting process‡            | 10   | Describe the methods of charting data from the included sources of evidence (e.g., calibrated forms or forms that have been tested by the team before their use, and whether data charting was done independently or in duplicate) and any processes for obtaining and confirming data from investigators. | 3                  |

| SECTION                                               | ITEM | PRISMA-ScR CHECKLIST ITEM                                                                                                                                                                             | REPORTED ON PAGE # |
|-------------------------------------------------------|------|-------------------------------------------------------------------------------------------------------------------------------------------------------------------------------------------------------|--------------------|
| Data items                                            | 11   | List and define all variables for which data were sought and any assumptions and simplifications made.                                                                                                | 3                  |
| Critical appraisal of individual sources of evidence§ | 12   | If done, provide a rationale for conducting a critical appraisal of included sources of evidence; describe the methods used and how this information was used in any data synthesis (if appropriate). | NA                 |
| Synthesis of results                                  | 13   | Describe the methods of handling and summarizing the data that were charted.                                                                                                                          | 3                  |
| <b>RESULTS</b>                                        |      |                                                                                                                                                                                                       |                    |
| Selection of sources of evidence                      | 14   | Give numbers of sources of evidence screened, assessed for eligibility, and included in the review, with reasons for exclusions at each stage, ideally using a flow diagram.                          | 3-4                |
| Characteristics of sources of evidence                | 15   | For each source of evidence, present characteristics for which data were charted and provide the citations.                                                                                           | Appendix Table S1  |
| Critical appraisal within sources of evidence         | 16   | If done, present data on critical appraisal of included sources of evidence (see item 12).                                                                                                            | NA                 |
| Results of individual sources of evidence             | 17   | For each included source of evidence, present the relevant data that were charted that relate to the review questions and objectives.                                                                 | Appendix Table S1  |
| Synthesis of results                                  | 18   | Summarize and/or present the charting results as they relate to the review questions and objectives.                                                                                                  | 4-5                |
| <b>DISCUSSION</b>                                     |      |                                                                                                                                                                                                       |                    |
| Summary of evidence                                   | 19   | Summarize the main results (including an overview of concepts, themes, and types of evidence available), link to the review questions and objectives, and consider the relevance to key groups.       | 5-11               |
| Limitations                                           | 20   | Discuss the limitations of the scoping review process.                                                                                                                                                | 12                 |
| Conclusions                                           | 21   | Provide a general interpretation of the results with respect to the review questions and objectives, as well as potential implications and/or next steps.                                             | 12                 |
| <b>FUNDING</b>                                        |      |                                                                                                                                                                                                       |                    |
| Funding                                               | 22   | Describe sources of funding for the included sources of evidence, as well as sources of funding for the scoping review. Describe the role of the funders of the scoping review.                       | 12                 |

From: Tricco AC, Lillie E, Zarin W, O'Brien KK, Colquhoun H, Levac D, et al. PRISMA Extension for Scoping Reviews (PRISMA-ScR): Checklist and Explanation. *Ann Intern Med.* 2018;169:467–473. [doi: 10.7326/M18-0850](https://doi.org/10.7326/M18-0850).

**Table S2.** Characteristics of included studies. BI: bleeding index, CAL: Clinical attachment level, CRP: C-reactive protein, GI: Gingival index, IDB: Interdental brush, MMP: Matrix metalloproteinase, MPO: Myeloperoxidase, MTB: Manual toothbrush, N/A: Not applicable, NP: Non pregnant woman, OR: Odds ratio, P: Pregnant woman, PE: Pre-eclampsia, PD: Periodontal disease, PI: Plaque index, PP: Post-partum woman, PPD: Pocket probing depth, TIMP: Tissue inhibitor of matrix metalloproteinase

| Author          | Year | Design                                          | Population                                                  | Study Aim                                                                                                                                                 | Main Findings                                                                                                                                                                                                                                                                                                                                                                                                                                                                                                                           |
|-----------------|------|-------------------------------------------------|-------------------------------------------------------------|-----------------------------------------------------------------------------------------------------------------------------------------------------------|-----------------------------------------------------------------------------------------------------------------------------------------------------------------------------------------------------------------------------------------------------------------------------------------------------------------------------------------------------------------------------------------------------------------------------------------------------------------------------------------------------------------------------------------|
| Figuerro [24]   | 2013 | Systematic review                               | P, NP, PP                                                   | To quantitatively estimate the association between pregnancy and GI                                                                                       | A significantly lower GI in pregnant women in the first term compared with those in their second or third term of pregnancy<br>A significantly lower GI in pregnant women in the first term compared with those in their second or third term of pregnancy<br>GI was significantly lower in P (1 <sup>st</sup> term) compared with P (2 <sup>nd</sup> or 3 <sup>rd</sup> term)<br>GI score was lower in PP women compared with P (2 <sup>nd</sup> term)<br>GI was lower in NP compared with P (2 <sup>nd</sup> or 3 <sup>rd</sup> term) |
| Cristi [25]     | 2019 | Observational study                             | N=228, P (different gestational ages)                       | To evaluate the frequency of epulis gravidarum according to nasal and oral symptoms                                                                       | Epulis risk was increased in P presenting nasal and gum disorders                                                                                                                                                                                                                                                                                                                                                                                                                                                                       |
| Figueiredo [26] | 2019 | Retrospective cohort study                      | N=142, P (16 <sup>th</sup> week until the end of gestation) | To investigate the repercussion of PD in the P health and the complications during pregnancy and delivery                                                 | PD increased the risk of neonatal and maternal negative outcomes                                                                                                                                                                                                                                                                                                                                                                                                                                                                        |
| Onigbinde [27]  | 2014 | Observational study                             | N=415, P (different gestational ages)                       | To determine the association of so variables and the periodontal status in P                                                                              | The oral hygiene index simplified was significantly increased with the trimester of pregnancy                                                                                                                                                                                                                                                                                                                                                                                                                                           |
| Wu [28]         | 2015 | Literature review                               | N/A                                                         | To analyze the effects of progesterone and estrogen on the change of subgingival microbiota and immunologic physiological mediators in periodontal tissue | The increased plasma levels of estrogen and progesterone was associated with a decline in periodontal health status, the increasing of the influence of subgingival microbiota and a spectrum of inflammatory responses in gingival tissues                                                                                                                                                                                                                                                                                             |
| Preethi [29]    | 2015 | Literature review                               | N/A                                                         | To analyze the effect of estrogen and progesterone on oral mucosa and PD                                                                                  | The estrogen and progesterone modified metabolism and immunology of the body and increased the risk of PD                                                                                                                                                                                                                                                                                                                                                                                                                               |
| Yunita [31]     | 2020 | Cross-sectional study                           | N=192, P (different gestational ages)                       | To determine the association between self-perceived oral health problems and professionally diagnosed oral health status in P                             | The prevalence of PD among P in this study were relatively high                                                                                                                                                                                                                                                                                                                                                                                                                                                                         |
| da Silva [32]   | 2021 | Systematic review (82 cross-sectional/clinical) | N/A                                                         | To analyze the association between clinical measures of gingival inflammation and body mass index                                                         | The higher measures of gingival inflammation are associated with higher body mass index                                                                                                                                                                                                                                                                                                                                                                                                                                                 |

trials, 3  
case-  
controls, 5  
cohorts)

|                                 |      |                       |                                                                                                                    |                                                                                                                                                                                                                                               |                                                                                                                                                                                                                                                                                                                                                                                                                                                                                           |
|---------------------------------|------|-----------------------|--------------------------------------------------------------------------------------------------------------------|-----------------------------------------------------------------------------------------------------------------------------------------------------------------------------------------------------------------------------------------------|-------------------------------------------------------------------------------------------------------------------------------------------------------------------------------------------------------------------------------------------------------------------------------------------------------------------------------------------------------------------------------------------------------------------------------------------------------------------------------------------|
| Silva de Araujo Figueiredo [34] | 2017 | Literature review     | N/A                                                                                                                | To depict the main oral diseases that are related to pregnancy; to clarify some of the possible systemic mechanisms that are associated with these changes; and to address issues about oral care during pregnancy                            | The most frequent oral manifestations during the pregnancy are: pyogenic granuloma, gingivitis, and periodontitis<br>No change in the amount of oral biofilm was observed during pregnancy<br>The oral biofilm increased the risk and the severity of PD during pregnancy                                                                                                                                                                                                                 |
| González-Jaranay [36]           | 2017 | Cohort study          | N=96, P (8-10 weeks, 21-23 weeks and 34-36 weeks of gestation) and at 40 days PP                                   | To analyze periodontal status at successive stages of pregnancy and 3-6 weeks PP in women with initial periodontal alterations                                                                                                                | PI, GI and Percentage of sites with Probing Depth >3 mm increased during pregnancy and decreased PP                                                                                                                                                                                                                                                                                                                                                                                       |
| Foratori-Junior [37]            | 2020 | Cross-sectional study | N=100, obesity/overweight P, normal weight P                                                                       | To evaluate the association between pre-pregnancy overweight/obesity, periodontitis during the third trimester of pregnancy, and the infants' birth weight                                                                                    | PPD and CAL was higher in obesity/overweight P compared with normal weight P                                                                                                                                                                                                                                                                                                                                                                                                              |
| Lain [38]                       | 2007 | Literature review     | N/A                                                                                                                | To describe metabolic changes during pregnancy                                                                                                                                                                                                | Early gestation was an anabolic state in the mother with an increase in maternal fat stores and small increases in insulin sensitivity<br>Late pregnancy was a catabolic state with decreased insulin sensitivity (increased insulin resistance)                                                                                                                                                                                                                                          |
| Wang [39]                       | 2016 | Cross-sectional study | N=4260, P (n=322), NP                                                                                              | To analyze the effects on systemic metabolism from the alterations in maternal glucose and lipid balance                                                                                                                                      | The multiple metabolic measures (intermediate-density, low-density and high-density lipoprotein triglyceride, fatty acids, amino acids, low-grade inflammatory marker glycoprotein acetyls, IL-18) increased in magnitude across the three trimesters                                                                                                                                                                                                                                     |
| Machado [40]                    | 2012 | Case-control study    | N=40, P (n=20, 14-24 weeks of gestation), NP (n=20)                                                                | To test the hypothesis of qualitative and quantitative differences of 8 periodontopathogens between pregnant and non-pregnant women                                                                                                           | The clinical parameters showed no significant differences between P and NP.<br>The numbers of subgingival periodontopathogens were not found to be significantly different between groups, despite the higher mean counts of <i>P. intermedia</i> in P                                                                                                                                                                                                                                    |
| Massoni [41]                    | 2019 | Cohort study          | N=67, P (n=16, 1st trimester), P (n=21, 2 <sup>nd</sup> trimester), P (n=15, 3 <sup>rd</sup> trimester), NP (n=15) | To identify quantitatively and qualitatively the subgingival flora in different gestational trimesters, compared to NP To evaluate the correlations between epidemiological characteristics, clinical diagnosis, microbiological findings and | <i>T. forsythia</i> was highly prevalent during the 1 <sup>st</sup> trimester and was correlated with the diagnosis of gingivitis among P. <i>P. gingivalis</i> was positively correlated with progesterone levels in the 1 <sup>st</sup> trimester.<br>Gestation was positively correlated with the total amount of bacteria, without influence of the hormonal levels or the epidemiological factors evaluated<br><i>T. forsythia</i> favored occurrence of gingivitis during pregnancy |

|                  |      |                    |                                                                         |                                                                                                                                                                                                                         |                                                                                                                                                                                                                                                                                                                                                                                              |
|------------------|------|--------------------|-------------------------------------------------------------------------|-------------------------------------------------------------------------------------------------------------------------------------------------------------------------------------------------------------------------|----------------------------------------------------------------------------------------------------------------------------------------------------------------------------------------------------------------------------------------------------------------------------------------------------------------------------------------------------------------------------------------------|
|                  |      |                    |                                                                         | levels of estradiol and progesterone                                                                                                                                                                                    | The progesterone levels in the 1 <sup>st</sup> trimester enhanced the growth of <i>P. gingivalis</i>                                                                                                                                                                                                                                                                                         |
| Gürsoy [42]      | 2016 | Cohort study       | N=30, women followed at three time points during pregnancy and twice PP | To analyze salivary levels of human beta-defensin (hBD)-1, -2, -3, and human neutrophil peptide (HNP)-1 in P, and their relation to periodontal status                                                                  | The salivary concentrations of hBD-1, hBD-2, and HNP-1 were reduced especially during the 3 <sup>rd</sup> trimester, The hBD-3 concentrations did not change during pregnancy and post-partum visits<br>Weak associations were observed between salivary defensin and hormone concentrations and clinical parameters                                                                         |
| Preshaw [43]     | 2013 | Literature review  | N/A                                                                     | To analyze the association between hormone and the periodontium                                                                                                                                                         | The increase in circulating levels of estrogen and progesterone should have a dramatic effect on the periodontium throughout pregnancy                                                                                                                                                                                                                                                       |
| Wu [46]          | 2016 | Case-control study | N=50, P (n=30), NP (n=20)                                               | To evaluate the effects of hormonal changes during pregnancy on gingival inflammation and interleukin-1 $\beta$ (IL-1 $\beta$ ) and tumor necrosis factor- $\alpha$ (TNF- $\alpha$ ) in gingival crevicular fluid (GCF) | PI, BI and GI increased significantly during pregnancy<br>No significant changes in PI, CAL, IL-1 $\beta$ , or TNF- $\alpha$ GCF levels<br>IL-1 $\beta$ , not TNF- $\alpha$ , was higher in P group than in NP group<br>No correlation with serum hormone levels was observed during pregnancy. GI and BI showed significant positive correlation with serum hormone levels during pregnancy |
| Saadaoui [10]    | 2021 | Literature review  | N/A                                                                     | To summarize the dynamics of oral microbiome during pregnancy and to discuss the relationship between a dysbiotic oral microbiome and pregnancy complications                                                           | Sex hormones may cause a significant shift in the oral microbiome composition which leads to dysbiosis and an altered immune response<br>Chronic periodontal infections can cause both local and systemic inflammatory responses                                                                                                                                                             |
| Abu-Raya [47]    | 2020 | Literature review  | N/A                                                                     | To describe the dynamic changes occurring in the peripheral maternal immune system during normal pregnancy                                                                                                              | During pregnancy, the immune system is modified to be able to tolerate the fetus<br>This modification affects the defensive system of periodontal tissues                                                                                                                                                                                                                                    |
| Markou [48]      | 2009 | Literature review  | N/A                                                                     | To analyze the influence of sex steroid hormones on gingiva of women                                                                                                                                                    | Some oral micro-organisms synthesize enzymes needed for steroid synthesis and catabolism<br>During pregnancy, the production of sex steroid hormones was increased which resulted in increased gingival inflammation, characterized by gingival enlargement, increased gingival bleeding and crevicular fluid flow and microbial changes                                                     |
| Jafri [50]       | 2015 | Case reports       | N=2, P (n=1, 6 months of gestation), NP (n=2)                           | To analyze how a same hormone at different age and stage shows an exaggerated gingival response to plaque                                                                                                               | Female sex hormones are implicated in the changes in periodontal conditions<br>The gingival inflammation is exacerbated during puberty, pregnancy and at the postmenopausal stage<br>A same hormone at different age and stage shows an exaggerated inflammatory response to the plaque<br>Strict oral hygiene maintenance is of high importance                                             |
| Mascarenhas [51] | 2003 | Literature review  | N/A                                                                     | To address the link between sex hormones and the periodontium<br>To analyze how these hormones influence the periodontium at different life times                                                                       | Sexual hormones play a key role in PD progression and wound healing. During pregnancy, there is an increase of PD<br>The influence of sex hormones can be minimized with good plaque control                                                                                                                                                                                                 |

|                    |      |                    |                                                                                            |                                                                                                                                                                                                     |                                                                                                                                                                                                                                                                                                                                                                                                                                                                                                                                                                                                                          |
|--------------------|------|--------------------|--------------------------------------------------------------------------------------------|-----------------------------------------------------------------------------------------------------------------------------------------------------------------------------------------------------|--------------------------------------------------------------------------------------------------------------------------------------------------------------------------------------------------------------------------------------------------------------------------------------------------------------------------------------------------------------------------------------------------------------------------------------------------------------------------------------------------------------------------------------------------------------------------------------------------------------------------|
| Mor [52]           | 2017 | Literature review  | N/A                                                                                        | To analyze the immunological responses at the receptive maternal–fetal interface<br>To discuss the role of the microbiota in promoting a tolerogenic maternal immune system                         | During pregnancy, there is an immune suppression and consequently a period of increased risk of bacterial and viral infection<br>Interferon- $\beta$ is a crucial immune modulator during pregnancy; it protects the fetus against viral infections and contributes to the process of immune regulation at the maternal–fetal interface<br>The immune response associated with placental viral infections can affect maternal and fetal survival                                                                                                                                                                         |
| Challis [53].      | 2009 | Literature review  | N/A                                                                                        | To analyze inflammation process during pregnancy                                                                                                                                                    | During pregnancy, the balance of Th1 and Th2 cytokines is characterized by an initial prevalence of Th2 cytokines, followed by a progressive shift toward Th1 predominance late in gestation<br>Hypoxia and the innate immune response are 2 adaptive mechanisms by which organisms respond to perturbation in organ function, playing a major role in spontaneous PE                                                                                                                                                                                                                                                    |
| Yang [54].         | 2019 | Case-control study | N=34, P (n=34, 1 <sup>st</sup> trimester) with healthy gingiva (n=22) or gingivitis (n=12) | To generate preliminary data about the subgingival microbiome of pregnant, African American women<br>to explore associations among the microbiome, periodontal inflammation and preterm birth       | No differences in overall microbiome diversity between the healthy gingiva and the gingivitis groups were observed<br>Significant differences were found among the bacterial taxa present<br>The gingivitis group had higher levels of salivary IL-1 $\beta$ and MMP-8, while CRP was not different between groups<br>Microbiome diversity was positively associated with CRP level                                                                                                                                                                                                                                      |
| Gürsoy [57]        | 2014 | Cohort study       | N=30, P (10 $\pm$ 1 weeks of gestation)                                                    | To define inflammatory proteins in saliva, induced or inhibited by estradiol, as early diagnostic biomarkers or target proteins in relation to pregnancy-associated gingivitis                      | In saliva, estradiol concentrations were associated positively with TIMP-1 and negatively with MPO and MMP-8 concentrations                                                                                                                                                                                                                                                                                                                                                                                                                                                                                              |
| Borgo [58]         | 2014 | Case-control study | N=32, P (n=23, 2 <sup>nd</sup> or 3 <sup>rd</sup> trimester), NP (n=9)                     | To determine the gingival conditions and the quantitative detection for <i>A. actinomycetemcomitans</i> , <i>F. nucleatum</i> , <i>P. gingivalis</i> and <i>P. intermedia</i> in pregnant women     | A significant relationship with the presence of <i>A. actinomycetemcomitans</i> among pregnant women at 2 <sup>nd</sup> and 3 <sup>rd</sup> trimester<br>A significant increase of the gingival inflammation was observed between the 2nd and 3rd trimesters of pregnancy<br>An increase in PI, GI, BI, PPD, and CAL values was observed in P compared with NP<br>During pregnancy, <i>P. intermedia</i> were observed in higher levels compared to <i>P. gingivalis</i><br>A high incidence of <i>F. nucleatum</i> during the 2 <sup>nd</sup> and 3 <sup>rd</sup> trimester of pregnancy, as well as in NP was observed |
| Nuriel-Ohayon [59] | 2016 | Literature review  | N/A                                                                                        | To describe the microbial changes that occur in the pregnant female, as well as provide an overview of the initial exposure of the fetus to microbiota—from the placenta, through birth and infancy | The total viable count was higher in P compared with NP<br>During the pregnancy, <i>P. gingivalis</i> , <i>A. actinomycetemcomitans</i> and <i>Candida</i> were increased<br>The dysbiosis of the microbiota would be associated with adverse pregnancy outcomes                                                                                                                                                                                                                                                                                                                                                         |

|                   |      |                       |                                                        |                                                                                                                                  |                                                                                                                                                                                                                                                                                                                                                                                                                                                                                                                                                                                                                                                                                                                                                       |
|-------------------|------|-----------------------|--------------------------------------------------------|----------------------------------------------------------------------------------------------------------------------------------|-------------------------------------------------------------------------------------------------------------------------------------------------------------------------------------------------------------------------------------------------------------------------------------------------------------------------------------------------------------------------------------------------------------------------------------------------------------------------------------------------------------------------------------------------------------------------------------------------------------------------------------------------------------------------------------------------------------------------------------------------------|
| Fujiwara [60]     | 2017 | Case-control study    | N=183, P (n=132), NP (n=51)                            | To examine the changes in the oral microbiota between pregnancy and nonpregnancy periods                                         | The total cultivable microbial counts in the early pregnancy were significantly higher than that of the NP<br>The incidences of <i>P. gingivalis</i> and <i>A. actinomycetemcomitans</i> in gingival sulcus during the early and middle pregnancy were significantly higher than the NP group<br><i>P. intermedia</i> and <i>F. nucleatum</i> did not change during pregnancy<br><i>Candida</i> species were more frequent during the middle and late pregnancy                                                                                                                                                                                                                                                                                       |
| Lin [61]          | 2018 | Case-control study    | N=18, P (n=11, <42 weeks of gestation), NP (n=7)       | To explore the bacterial diversity and ecological shifts in the supragingival plaques of P                                       | There was distinct clustering according to gestational status (33 genera may contribute)<br><i>Neisseria</i> , <i>Porphyromonas</i> , and <i>Treponema</i> were over-represented in P<br><i>Streptococcus</i> and <i>Veillonella</i> were more abundant in NP<br>53 operational taxonomic units were observed to have positive correlations with sex hormones, with <i>Prevotella</i> spp. and <i>Treponema</i> spp. being most abundant                                                                                                                                                                                                                                                                                                              |
| Balan [62]        | 2018 | Case-control study    | N=24, P (n=10 each across the 3 trimesters), PP (n=10) | To analyze the variations in the oral microbial composition and diversity with the progression of pregnancy and in the PP period | The oral microbial diversity was stable during pregnancy and PP<br>The microbiome makes a pathogenic shift during pregnancy and reverts back to a healthy microbiome during the PP<br>During pregnancy, a higher abundance of pathogenic taxa from genera <i>Prevotella</i> , <i>Streptococcus</i> and <i>Veillonella</i> in both subgingival placa and saliva samples was observed<br>During pregnancy, a higher abundance of <i>Prevotella</i> species, <i>P. gingivalis</i> , and <i>F. nucleatum</i> was observed<br>A significant decrease in the abundance of pathogenic species in P compared with NP was observed<br>Bacterial communities have different co-occurrence and co-exclusion relationships during pregnancy and postpartum period |
| DiGiulio [63]     | 2015 | Case-control study    | N=49, P (n=49 among them, 15 delivered preterm)        | To analyze the microbiota compositional dynamics during and after pregnancy                                                      | Microbiota community (vagina, distal gut, saliva, and tooth/gum) taxonomic composition and diversity remained remarkably stable                                                                                                                                                                                                                                                                                                                                                                                                                                                                                                                                                                                                                       |
| Cobb [64]         | 2017 | Literature review     | N/A                                                    | To review the oral, vaginal, and placental microbiomes and consider their potential impact on adverse pregnancy outcomes         | An association between the dissemination of pathogenic bacteria was associated with moderate and severe periodontitis and extraoral infections and inflammation<br>Specific oral pathogenic bacteria, for example, <i>F. nucleatum</i> , <i>P. gingivalis</i> , <i>F. alocis</i> , <i>C. rectus</i> , and others, represented potential collaborators in adverse outcomes of pregnancy<br>The association between PD, the inherent bacteria and systemic impact of inflammatory mediators, and adverse pregnancy outcomes involves several pathways                                                                                                                                                                                                   |
| Tellapragada [65] | 2014 | Cross-sectional study | N=390, P (n=390, 8–24 weeks of gestation)              | To study the periodontal infections among asymptomatic P and to find an association of bacterial etiologies with the disease     | Prevalence of gingivitis was 38% and clinical periodontitis was 10% among the study population<br>Among the periodontitis group, high detection rates of <i>P. gingivalis</i> (56%), <i>P. nigrescens</i> (44%), <i>T. denticola</i> (32%), and <i>P. intermedius</i> (24%) were noted along with significant association with the disease                                                                                                                                                                                                                                                                                                                                                                                                            |

|                 |      |                    |                                                                   |                                                                                                                                                                                 |                                                                                                                                                                                                                                                                                                                                                                                                                                                                                                                                                                                                                                                                                                   |
|-----------------|------|--------------------|-------------------------------------------------------------------|---------------------------------------------------------------------------------------------------------------------------------------------------------------------------------|---------------------------------------------------------------------------------------------------------------------------------------------------------------------------------------------------------------------------------------------------------------------------------------------------------------------------------------------------------------------------------------------------------------------------------------------------------------------------------------------------------------------------------------------------------------------------------------------------------------------------------------------------------------------------------------------------|
| Abusleme [66]   | 2013 | Case-control study | N=32, Subjects with PD (n=22), healthy (n=10)                     | To better understand the ecology of oral subgingival communities in health and periodontitis and elucidate the relationship between inflammation and the subgingival microbiome | In PD, presence of bleeding was not associated with different $\alpha$ -diversity or with a distinct microbiome<br>In PD, bleeding sites showed higher total bacterial load<br>Communities in health and periodontitis largely differed, with higher diversity and biomass in PD<br>Shifts in community structure from health to PD resembled ecological succession, with emergence of newly dominant taxa in PD without replacement of primary health-associated species<br>PD was associated with higher proportions of <i>Spirochetes</i> , <i>Synergistetes</i> , <i>Firmicutes</i> and <i>Chloroflexi</i><br><i>Actinobacteria</i> , particularly <i>Actinomyces</i> , were higher in health |
| Wei [67]        | 2013 | Meta-Analysis      | N=1089 PE patient                                                 | To ascertain the relationship between PD and PE                                                                                                                                 | The causality remains unclear<br>The association between PD and PE may reflect the induction of PD by the pre-eclamptic state, or it may be part of an overall exaggerated inflammatory response to pregnancy                                                                                                                                                                                                                                                                                                                                                                                                                                                                                     |
| Fischer [68]    | 2019 | Literature review  | N/A                                                               | To describe the placenta colonization with periodontal pathogens                                                                                                                | Periodontal pathogens in placental tissue were associated with multiple adverse pregnancy outcomes<br>Both placental and oral microbiomes may play a role in periodontitis-associated adverse pregnancy outcomes                                                                                                                                                                                                                                                                                                                                                                                                                                                                                  |
| Konopka [69]    | 2020 | Systematic review  | N=2724, P (among them 195 suffered of PE)                         | To review systematic cohort and randomized trials on the relationship between periodontitis and PE                                                                              | A significant relationship between PD and the risk of PE was demonstrated in 5 cohort trials, which was not confirmed by only 1 study<br>The impact of non-surgical treatment (scaling and root planing) on the occurrence of PE was not confirmed                                                                                                                                                                                                                                                                                                                                                                                                                                                |
| Daalderop [70]  | 2018 | Systematic review  | N/A                                                               | To study the association between PD and adverse pregnancy outcomes                                                                                                              | Systematic reviews with the lowest risk of bias consistently demonstrated positive associations between PD and PE (odds ratio, 2.2; 95% CI, 1.4 to 3.4; 15 studies, 5,111 participants)<br>Estimated population-attributable fractions for PD were 10% to 55% for PE                                                                                                                                                                                                                                                                                                                                                                                                                              |
| Matevosyan [71] | 2011 | Meta-analysis      | N/A                                                               | To elucidate plausible associations between PD and pregnancy events                                                                                                             | Women with PE have poor periodontal parameters in both, treatment and placebo groups (OR 1.94–2.9)<br>Higher rates of tobacco use (RR 3.02), bacterial vaginosis (RR 2.7), clinical attachment level (OR 2.76), and fetal tyrosine kinase (OR 1.6) contribute in increased rates of PE (RR 1.68)                                                                                                                                                                                                                                                                                                                                                                                                  |
| Sgolastra [72]  | 2013 | Meta-analysis      | N/A                                                               | To study a possible association between PE and PD                                                                                                                               | A positive association was found between PE and PD (OR 2.17, 95% CI 1.38–3.41, P=0.0008)<br>A high and significant heterogeneity was found ( $\chi^2=62.42$ , P<0.00001, I <sup>2</sup> =75%)<br>In most cases, subgroup analysis had low power to detect significant differences between PE and non- PE groups                                                                                                                                                                                                                                                                                                                                                                                   |
| Desai [73]      | 2015 | Case-control study | N=1240, PP (48h after delivery) among them non-preeclamptic women | To evaluate the association between maternal PD and PE                                                                                                                          | Maternal PD (OR 19.8) was associated with PE<br>Maternal PD remained associated with PE after matching for primiparity, which was another significant confounding factor (OR 9.33).                                                                                                                                                                                                                                                                                                                                                                                                                                                                                                               |



|                  |      |                    |                                                |                                                                                                                                                                                                                                          |                                                                                                                                                                                                                                                                                                                                                                                                                                                                                                                                                                                                                                |
|------------------|------|--------------------|------------------------------------------------|------------------------------------------------------------------------------------------------------------------------------------------------------------------------------------------------------------------------------------------|--------------------------------------------------------------------------------------------------------------------------------------------------------------------------------------------------------------------------------------------------------------------------------------------------------------------------------------------------------------------------------------------------------------------------------------------------------------------------------------------------------------------------------------------------------------------------------------------------------------------------------|
|                  |      |                    | (n=1120) and preeclamptic women (n=120)        |                                                                                                                                                                                                                                          |                                                                                                                                                                                                                                                                                                                                                                                                                                                                                                                                                                                                                                |
| Huang [74]       | 2014 | Meta-analysis      | N/A                                            | To evaluate the association between maternal PD and the risk of PE                                                                                                                                                                       | <p>P (&lt;32 weeks of gestation) with PD had a 3.69-fold higher risk of developing PE compared with the one without PD (OR=3.69; 95% CI=2.58-5.27)</p> <p>PD within 48 h prior to delivery was associated with a 2.68-fold higher risk of PE (OR=2.68; 95% CI=1.39-5.18)</p> <p>P with PD within 5 days after delivery had a 2.22-fold higher risk of PE than P without PD (OR=2.22; 95% CI=1.16-4.27)</p>                                                                                                                                                                                                                     |
| Popova [75]      | 2013 | Literature review  | N/A                                            | To analyze microbiology of PD                                                                                                                                                                                                            | <p><i>P. gingivalis</i>, <i>T. denticola</i> and <i>T. forsythia</i> form a consortium in the subgingival biofilm and are regarded as the principal periodontopathogenic bacteria</p> <p><i>A. actinomycetemcomitans</i>, <i>F. nucleatum</i>, <i>P. intermedia</i>, <i>C. rectus</i>, <i>P. migros</i>, <i>E. corrodens</i> are implicated in the PD process</p>                                                                                                                                                                                                                                                              |
| Fox [76]         | 2019 | Literature review  | N/A                                            | To review the latest evidence base and guideline updates surrounding the diagnosis, management, and fetal surveillance in PE, as well as its increasingly recognized role as an independent cardiovascular risk factor for the offspring | <p>PE is a major cause of maternal morbidity and is associated with adverse fetal outcomes including intra-uterine growth restriction, preterm birth, placental abruption, fetal distress, and fetal death in utero</p> <p>Management of the fetus in PE involves timely delivery and prevention of adverse effects of prematurity with antenatal corticosteroids and/or magnesium sulphate depending on gestation</p> <p>PE has long-term adverse effects on the offspring</p>                                                                                                                                                |
| Beckers [77]     | 2020 | Literature review  | N/A                                            | To investigate the role of the microbiome in the developing placenta and its potential contribution to PE                                                                                                                                | <p><i>Lactobacillus</i> (<i>Firmicutes</i>) is thought to play a major role in preventing overgrowth of pathogenic bacteria</p> <p><i>B. cereus</i>, <i>Listeria</i>, <i>Salmonella</i>, <i>Escherichia</i>, <i>K. pneumonia</i>, <i>Anoxybacillus</i>, <i>Variovorax</i>, <i>Prevotella</i>, <i>Porphyromonas</i>, and <i>Dialister</i> were found in placental samples from mothers with PE</p> <p>High body mass index has been linked with PE</p>                                                                                                                                                                          |
| Aagaard [78]     | 2014 | Case-cohort study  | N=320                                          | To characterize the microbiome of the placenta                                                                                                                                                                                           | <p>The placental microbiome is composed of nonpathogenic commensal microbiota from the <i>Firmicutes</i>, <i>Tenericutes</i>, <i>Proteobacteria</i>, <i>Bacteroidetes</i>, and <i>Fusobacteria</i> phyla</p> <p>The placental microbiome profiles were most akin (Bray-Curtis dissimilarity &lt;0.3) to the human oral microbiome</p>                                                                                                                                                                                                                                                                                          |
| Amarasekara [79] | 2015 | Case-control study | N=110, P with PE (n=55), P normotensive (n=55) | To detect, identify, quantify and compare the bacteria present in the placental tissues of women with PE with that of normotensive P                                                                                                     | <p>12.7% of placental tissue samples from P with PE were PCR-positive whereas all the placental samples from P normotensive were negative</p> <p>The placental tissue samples from P with PE included <i>B. cereus</i>, <i>Listeria</i>, <i>Salmonella</i>, <i>Escherichia</i> (all of which are usually associated with gastrointestinal infection); <i>K. pneumonia</i> and <i>Anoxybacillus</i> (both of which are usually associated with respiratory tract infections); and <i>Variovorax</i>, <i>Prevotella</i>, <i>Porphyromonas</i>, and <i>Dialister</i> (all of which are usually associated with periodontitis)</p> |

|                 |      |                     |                                               |                                                                                                                                                                                                                                    |                                                                                                                                                                                                                                                                                                                                                                                                                                                                                                                                                 |
|-----------------|------|---------------------|-----------------------------------------------|------------------------------------------------------------------------------------------------------------------------------------------------------------------------------------------------------------------------------------|-------------------------------------------------------------------------------------------------------------------------------------------------------------------------------------------------------------------------------------------------------------------------------------------------------------------------------------------------------------------------------------------------------------------------------------------------------------------------------------------------------------------------------------------------|
| Barak [80]      | 2007 | Case-control study  | N=30, P with PE (n=16), P without PE (n=14)   | To explore the possibility that periopathogenic bacteria may translocate into the placental tissues of women with PE                                                                                                               | 50% of placenta specimens were positive for one or more periopathogenic bacteria in the PE group, compared to 14.3% from controls<br>Bacterial counts were statistically significantly higher in the PE group for all of the periopathogenic bacteria examined<br>All of the target periopathogenic bacteria were found in the PE group, only three ( <i>P. gingivalis</i> , <i>T. forsythensis</i> , and <i>T. denticola</i> ) were found in the control group                                                                                 |
| Han [81]        | 2011 | Literature review   | N/A                                           | To review the current status of epidemiological, mechanistic, and intervention studies on oral health and adverse pregnancy outcomes                                                                                               | Positive association between PD and adverse pregnancy outcome<br>Two non-mutually exclusive hypotheses: (i) PD affect the maternal and fetal immune responses systemically, leading to premature labor, (ii) oral bacteria may translocate directly into the pregnant uterus, causing localized inflammation and adverse pregnancy outcome in the presence or absence of clinical PD                                                                                                                                                            |
| Andrukhov, [82] | 2011 | Case-control study  | N=62, PD (n=37), PD healthy (n=25)            | To investigate the levels of interferon (IFN)- $\gamma$ , tumor necrosis factor (TNF)- $\alpha$ , and interleukin (IL)-2, -4, -5, and -10 in the serum of patients with PD in relation to the bacterial load in the dental plaques | Serum levels of IFN-g, TNF-a, and IL-10 were significantly increased, whereas those of IL-2 were significantly decreased in patients with PD compared to healthy<br>Increased serum levels of IFN-g and TNF-a in patients with PD were associated with the enhanced dental plaque load with <i>A. actinomycetemcomitans</i> and <i>P. gingivalis</i> , respectively<br><i>A. actinomycetemcomitans</i> and <i>T. denticola</i> was associated with an increased population of CD3+/CD16+ and CD3+/CD8+ cells, respectively                      |
| Parthiban [83]  | 2018 | Case-control study  | N=50, P with PE (n=25), P normotensive (n=25) | To determine the association between the presence of specific periodontal pathogens, Toll-like receptor-4 (TLR-4), and nuclear factor- $\kappa$ B (NF- $\kappa$ B) expression in the placental tissues of pre-eclamptic women      | The subgingival plaque samples of PE women showed significantly higher frequencies of <i>P. intermedia</i><br>In the placental samples, <i>P. gingivalis</i> , <i>P. intermedia</i> , and the expression of TLR-4 and NF- $\kappa$ B were found to be at significantly higher levels compared to normotensive P<br>TLR-4 was significantly influenced by the presence of <i>P. gingivalis</i> and <i>P. intermedia</i><br>NF- $\kappa$ B expression was influenced by the presence of <i>P. intermedia</i> in the placental tissues of PE women |
| Cleys [84]      | 2015 | Observational study | N=3, P (n=3, 1 <sup>st</sup> trimester)       | To investigate the role of testosterone in placental gene expression, and focused on androgen receptor                                                                                                                             | In human first trimester placental samples, Androgen receptor complexes with histone lysine demethylases KDM1A and KDM4D immunolocalized to the syncytiotrophoblast, with nuclear KDM1A and KDM4D immunostaining also present in the villous stroma placental androgen signaling, possibly through Androgen receptor-KDM complex recruitment to androgen response elements, regulates placental VEGFA expression                                                                                                                                |
| Khong [86]      | 2011 | Literature review   | N/A                                           | To analyze defective deep placentation                                                                                                                                                                                             | Defective deep placentation is characterized by defective remodeling of the utero-placental arteries<br>Under certain conditions, it is also characterized by the presence of arterial lesions, such as acute atherosclerosis and the persistence of endovascular trophoblast                                                                                                                                                                                                                                                                   |

|                 |      |                    |                                                                 |                                                                                                                                                                                                                              |                                                                                                                                                                                                                                                                                                                                                               |
|-----------------|------|--------------------|-----------------------------------------------------------------|------------------------------------------------------------------------------------------------------------------------------------------------------------------------------------------------------------------------------|---------------------------------------------------------------------------------------------------------------------------------------------------------------------------------------------------------------------------------------------------------------------------------------------------------------------------------------------------------------|
|                 |      |                    |                                                                 |                                                                                                                                                                                                                              | Defective deep placentation is linked to abnormalities of the endometrium and inner myometrium before or during the early stages of placentation                                                                                                                                                                                                              |
| Brosens [87]    | 2011 | Literature review  | N/A                                                             | To evaluate the biopsy technique to summarize the salient types of defective deep placentation and propose criteria for the classification of defective deep placentation into 3 types                                       | Defective deep placentation is associated with a spectrum of obstetrical syndromes that included preeclampsia. These disorders of deep placentation are characterized by: (i) the degree of restriction of physiologic transformation of the spiral arteries and (ii) the presence of arterial lesions in the junctional zone myometrium of the placental bed |
| Vigliani [88]   | 2014 | Literature review  | N/A                                                             | To describe how the human placenta might be infected by microorganisms via the hematogenous route                                                                                                                            | Many blood-borne pathogens ( <i>Listeria monocytogenes</i> or <i>Cytomegalovirus</i> ...) might arrive at the placenta via transportation inside of maternal leukocytes that enter the decidua in early pregnancy. Extravillous trophoblasts could get infected in the decidua and spread infection to other layers in the placenta                           |
| Chaparro [89]   | 2013 | Case-control study | N=58, Normotensive healthy P (n=33), P with hypertension (n=25) | To explore the associations between the presence of periodontal pathogens and the expression of TLR-2 and TLR-4 in the placental tissue of P with hypertensive disorders compared to the placentas of healthy normotensive P | A significant increase was observed in the expression of TLR-2 in the placentas of patients with hypertensive disorders. An association between the presence of <i>T. denticola</i> and <i>P. gingivalis</i> in placental tissues and hypertensive disorders was observed                                                                                     |
| Swati [90]      | 2012 | Case-control study | N=20, Normotensive healthy P (n=10), P with hypertension (n=10) | To establish causal relationship between PD and PE. To find out causal circumstantial evidence by isolating specific periodontal pathogens in oral and placental samples                                                     | Periodontal pathogens ( <i>P. gingivalis</i> , <i>F. nucleatum</i> , <i>T. denticola</i> , <i>P. intermedia</i> and <i>A. actinomycetemcomitans</i> ) were found to be high in the group with hypertension than the controls. <i>P. gingivalis</i> was found in all the samples from subgingival plaque and placenta, irrespective of the PD status.          |
| Vanterpool [91] | 2016 | Case-control study | N=134, Preterm (n=97, $\leq 32$ weeks gestation), Term (n=35)   | To determine if the location of <i>P. gingivalis</i> within placental and/or umbilical cord sections was associated with a specific delivery diagnosis at preterm delivery                                                   | <i>P. gingivalis</i> within the placenta was significantly associated with shorter gestation lengths and delivery via caesarean section but not with histological chorioamnionitis or preeclampsia                                                                                                                                                            |
| Reyes [92]      | 2018 | Literature review  | N/A                                                             | To provide an overview of past and current research on <i>P. gingivalis</i> that addresses some of the controversies concerning the role of this organism in the pathogenesis of adverse pregnancy outcome                   | A combination of preexisting periodontal disease and <i>P. gingivalis</i> placental colonization would increase the risk of APO in part by inducing a TH17/Treg cell imbalance. <i>P. gingivalis</i> will be a vascular pathogen of the placental bed                                                                                                         |
